# Supplementary material
Source: Springer Nature journal article supplement (https://www.springermedizin.de/resource/supplementary/12955_2012_1079_MOESM1_ESM.pdf/9559250)
Supplement: MOESM1 [file 9559250]

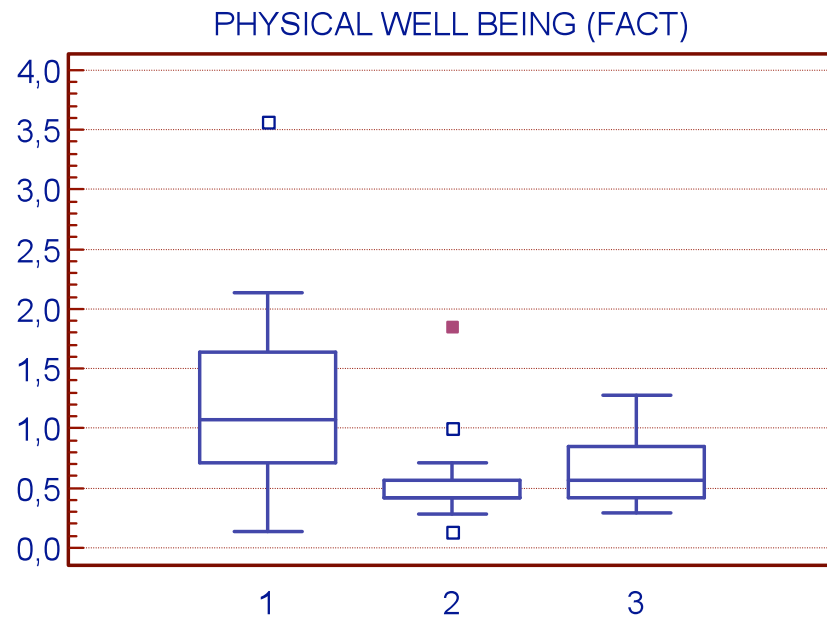

**Figure 1:** Box plot showing differences in physical well being average score across urinary diversions. (1CUS, 2BK-IC, 3ONB-VIP)
